# Supplementary material for: Enhancing the activity and tuning the mechanism of formic acid oxidation at tetrahexahedral Pt nanocrystals by Au decoration
Source: Royal Society of Chemistry journal article supplement (doi:10.1039/c2cp42930f), 2012-01-01
Supplement: c2cp42930f.pdf [file c2cp42930f.pdf]

## Supplementary Information

# Enhancing the Activity and Tuning the Mechanism of Formic acid Oxidation at Tetrahedral Pt Nanocrystals by Au Decoration

Hai-Xia Liu,<sup>a</sup> Na Tian,<sup>\*a</sup> Michael P. Brandon,<sup>b</sup> Jun Pei,<sup>a</sup> Zhi-Chao Huangfu,<sup>a</sup> Chi Zhan,<sup>a</sup> Zhi-You Zhou,<sup>a</sup> Christopher Hardacre,<sup>b</sup> Wen-Feng Lin,<sup>\*b</sup> and Shi-Gang Sun<sup>\*a</sup>

<sup>a</sup> State Key Lab of Physical Chemistry of Solid Surfaces, Department of Chemistry, College of Chemistry and Chemical Engineering, Xiamen University, Xiamen 361005, China.

<sup>b</sup> Centre for the Theory and Application of Catalysis (CenTACat), School of Chemistry and Chemical Engineering, Queen's University Belfast, Belfast BT9 5AG, UK

E-mail: <sup>\*</sup>Corresponding author Email: [sgsun@xmu.edu.cn](mailto:sgsun@xmu.edu.cn), [tnsd@xmu.edu.cn](mailto:tnsd@xmu.edu.cn)  
[w.lin@qub.ac.uk](mailto:w.lin@qub.ac.uk)

## 1. TEM characterization of Au-decorated THH Pt NCs

### 1.1 Identification of Miller indices of Au-decorated THH Pt NCs

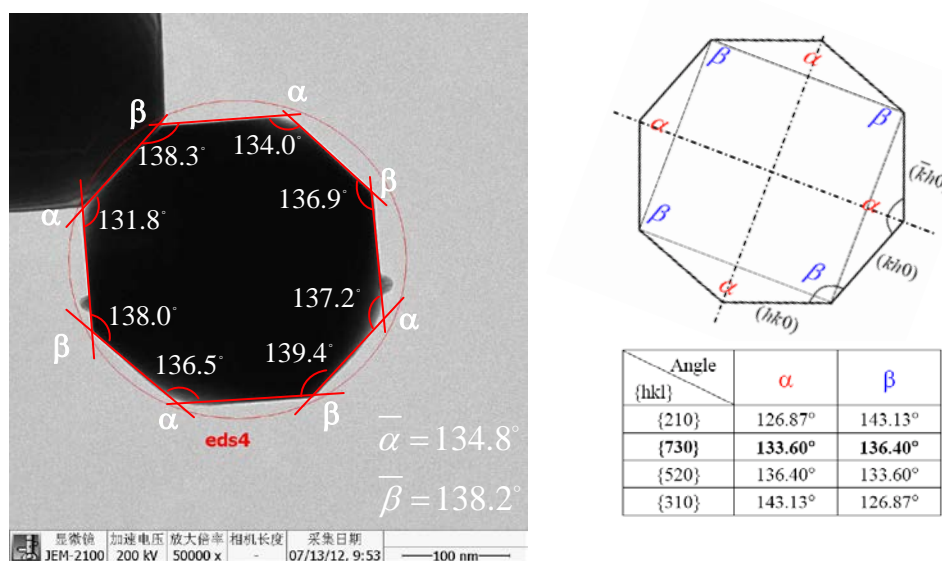

**Fig. S1** Identification of Miller indices of Au-decorated THH Pt NCs ( $\theta_{Au} = 0.79$ ).

Fig. S1 shows the TEM image of Au-decorated THH Pt NCs along [001] direction. In this orientation, eight side facets parallel to the [001] axis can be imaged edge-on and form an octagonal projection. On basis of plane angles ( $\alpha=134.8^\circ$ ;  $\beta=138.2^\circ$ ), the Miller indices of THH Pt NCs were also determined to be about {730} as we reported previously.<sup>S1</sup>

## 1.2 Identification of elemental composition and Au distribution

Fig. S2-S3 show TEM images and EDS spectra of Au-decorated THH Pt NCs ( $\theta_{\text{Au}} = 0.79$ ). Sub-monolayer Au atoms on Pt surface can not be discerned by the conventional TEM image. However, we can observe a few Au clusters on the THH Pt NC, indicating that some decorated Au exists as clusters besides Au monolayer (Fig. S3).

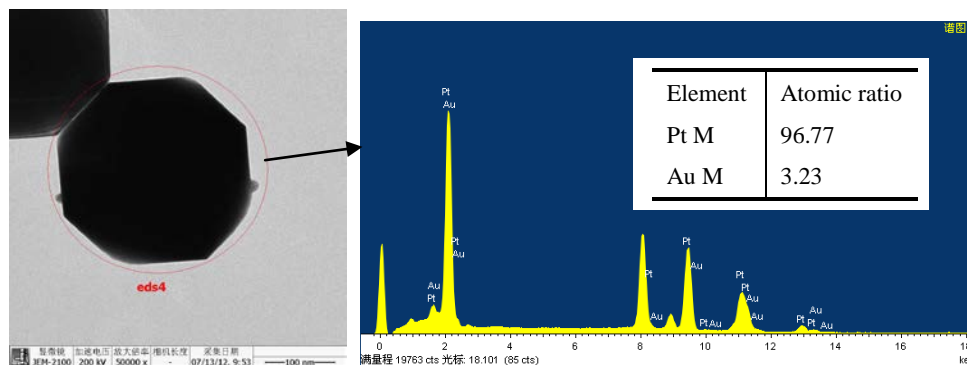

**Fig. S2** TEM images and EDS spectrum and elemental composition of the Au-decorated THH Pt NCs ( $\theta_{\text{Au}} = 0.79$ ).

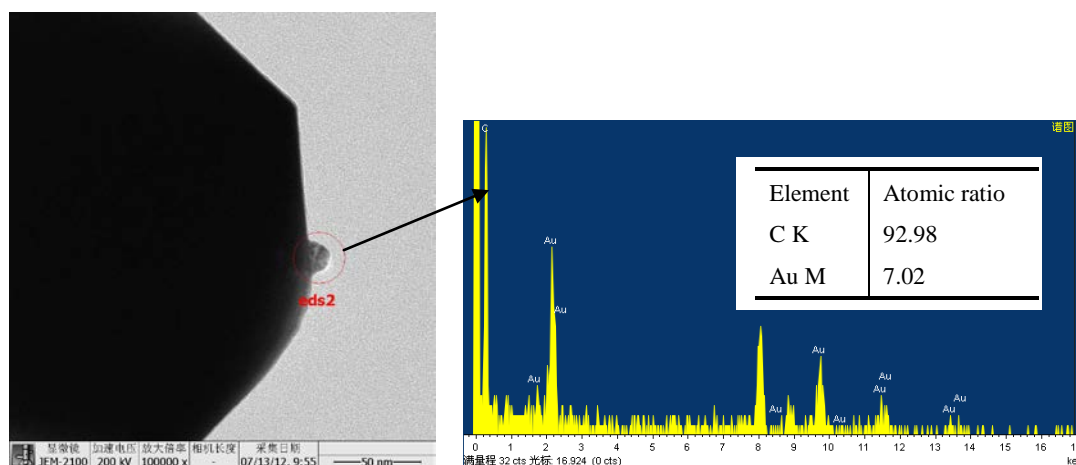

**Fig. S3** TEM images and EDS spectrum and elemental composition of the Au cluster.

## 2. Electrochemical stability of bare and Au-decorated THH Pt NCs subjected to potential cycling

The electrochemical stability of bare and Au-decorated THH Pt NCs is fairly good. Fig.S4 shows the CV curves of bare (a) and Au-decorated (b) THH Pt NCs before (black line) and after (red line) 1000 potential cycles between 0.6 ~ 1.1 V (vs. RHE) in 0.1 M H<sub>2</sub>SO<sub>4</sub> solution. The loss in electroactive surface area is less than 3% for both cases.

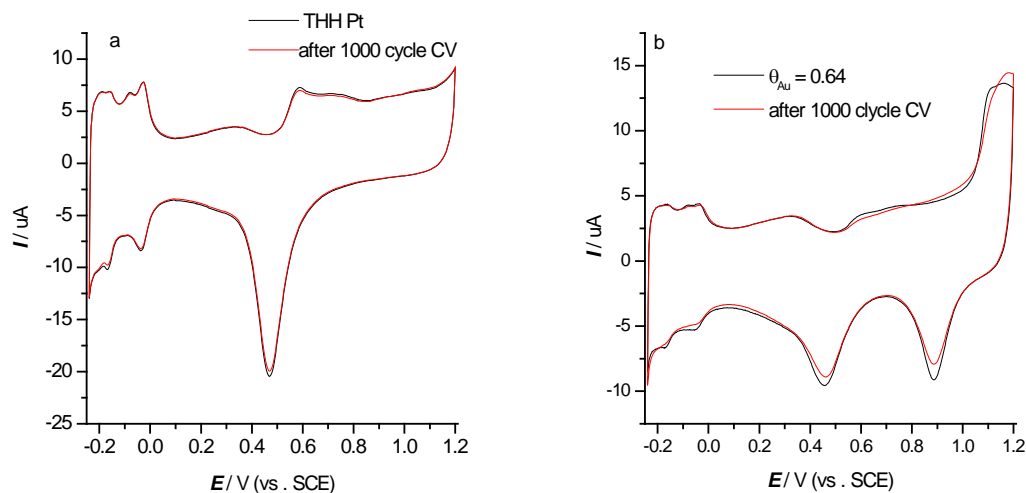

**Fig. S4** The CV of the bare THH Pt NCs (a) and the Au decorated THH Pt NCs ( $\theta_{\text{Au}} = 0.64$ ) (b) in 0.1 M H<sub>2</sub>SO<sub>4</sub>, and that of each electrode after 1000 cycles CV in 0.1 M H<sub>2</sub>SO<sub>4</sub> solution in the potential range 0.6~1.1V (vs .RHE), in 0.1 M H<sub>2</sub>SO<sub>4</sub>, scan rate: 50 mVs<sup>-1</sup>.

## References

- (S1) N. Tian, Z.-Y. Zhou, S.-G. Sun, Y. Ding and Z. L. Wang, *Science*, 2007, **316**, 732-735.
